# Supplementary material for: MOCCASIN: A method for correcting for known and unknown confounders in RNA splicing analysis
Source: bioRxiv or medRxiv preprint supplement (doi:10.1101/2020.06.16.154674), 2020-06-17

# Supplemental Figure 1

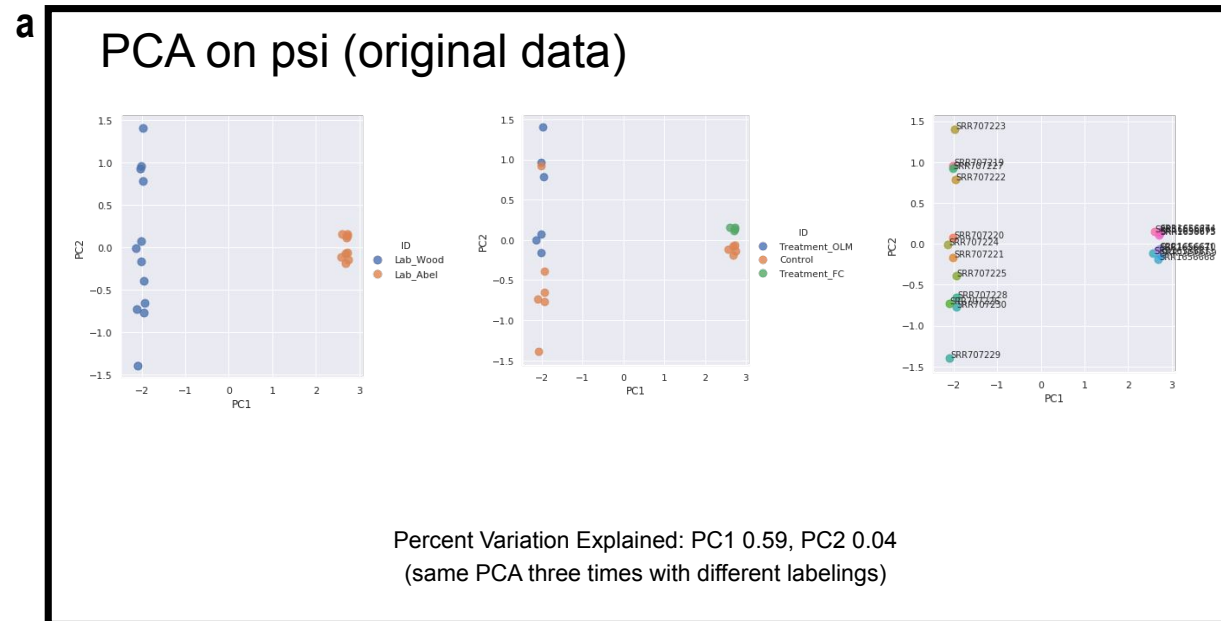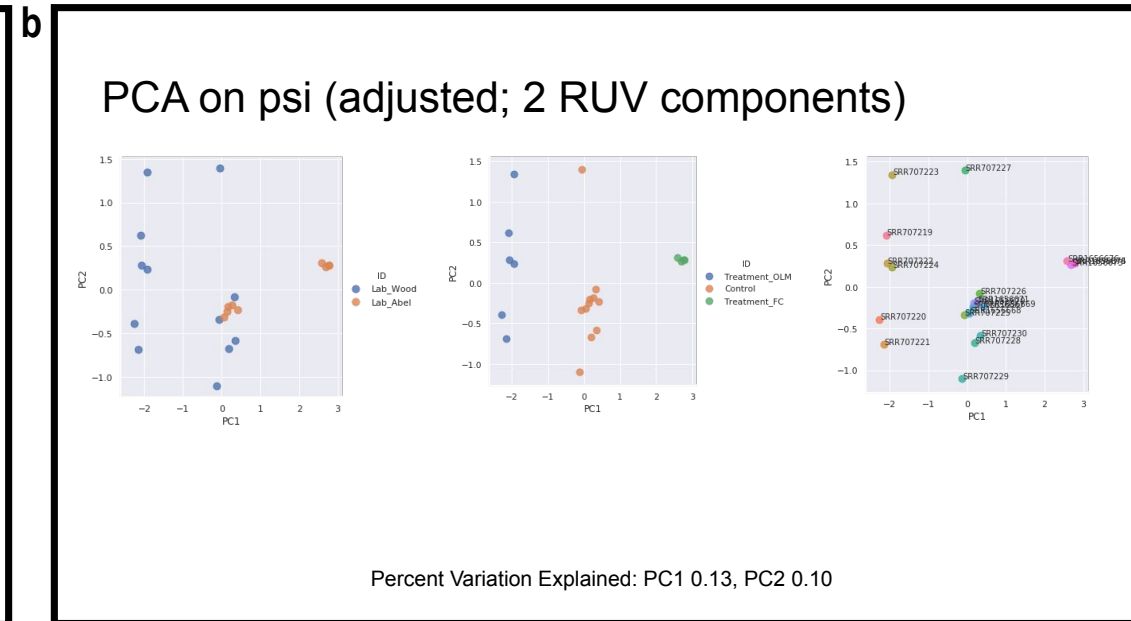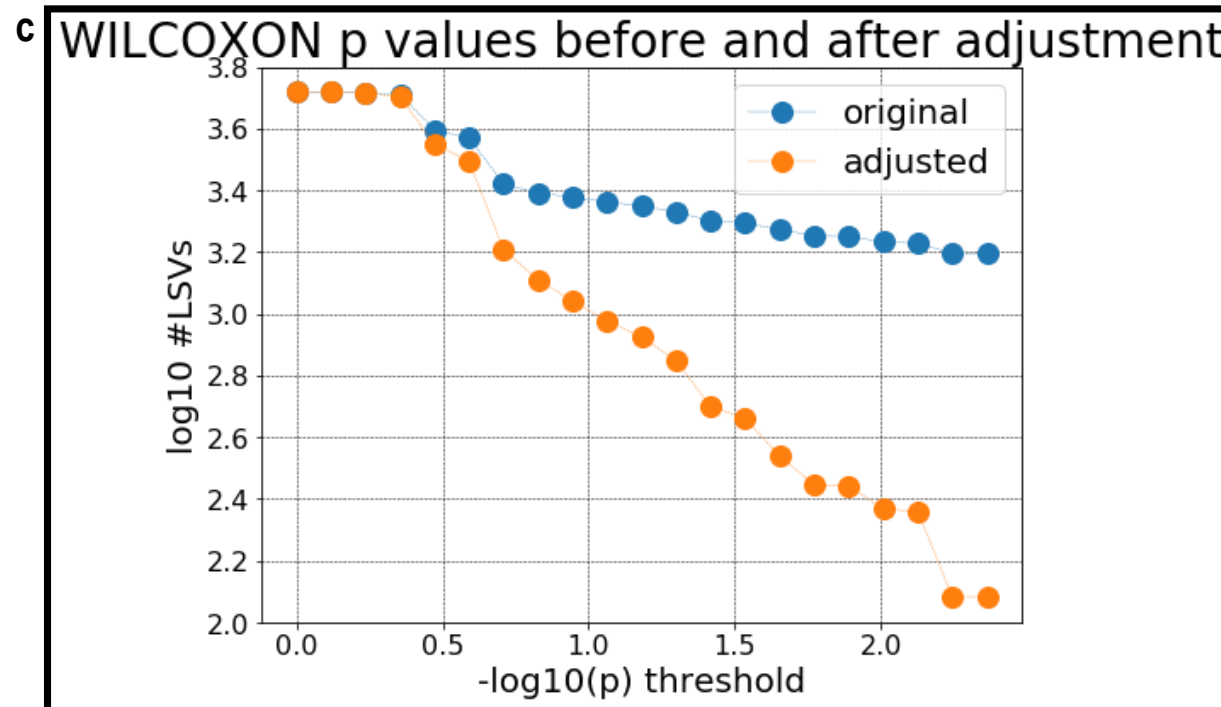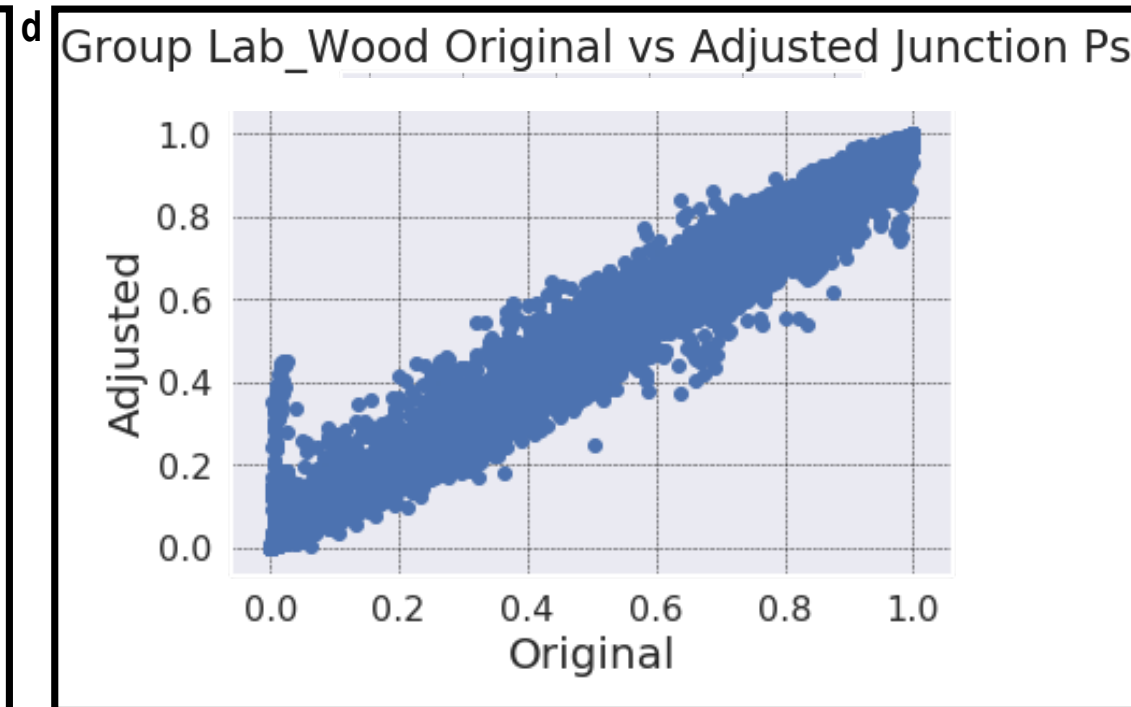

# Supplemental Figure 2

## Batch1vs2\_FPR

IE(dPSI)| $\geq$ 0.2 OR Probability $\geq$ 0.95

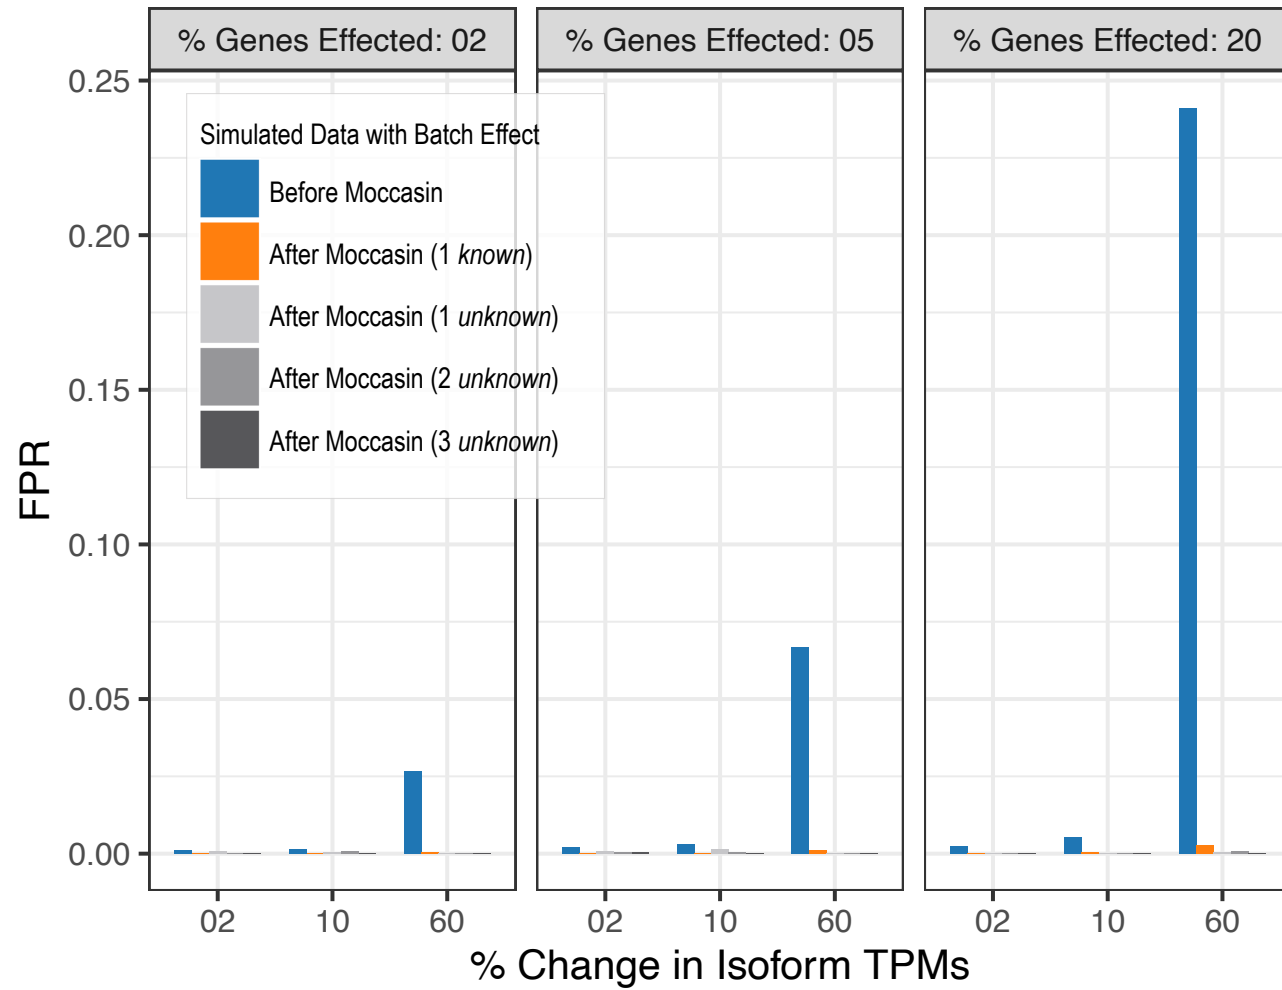

## AortaVsCerebellum\_FDR

IE(dPSI)| $\geq$ 0.2 OR Probability $\geq$ 0.95

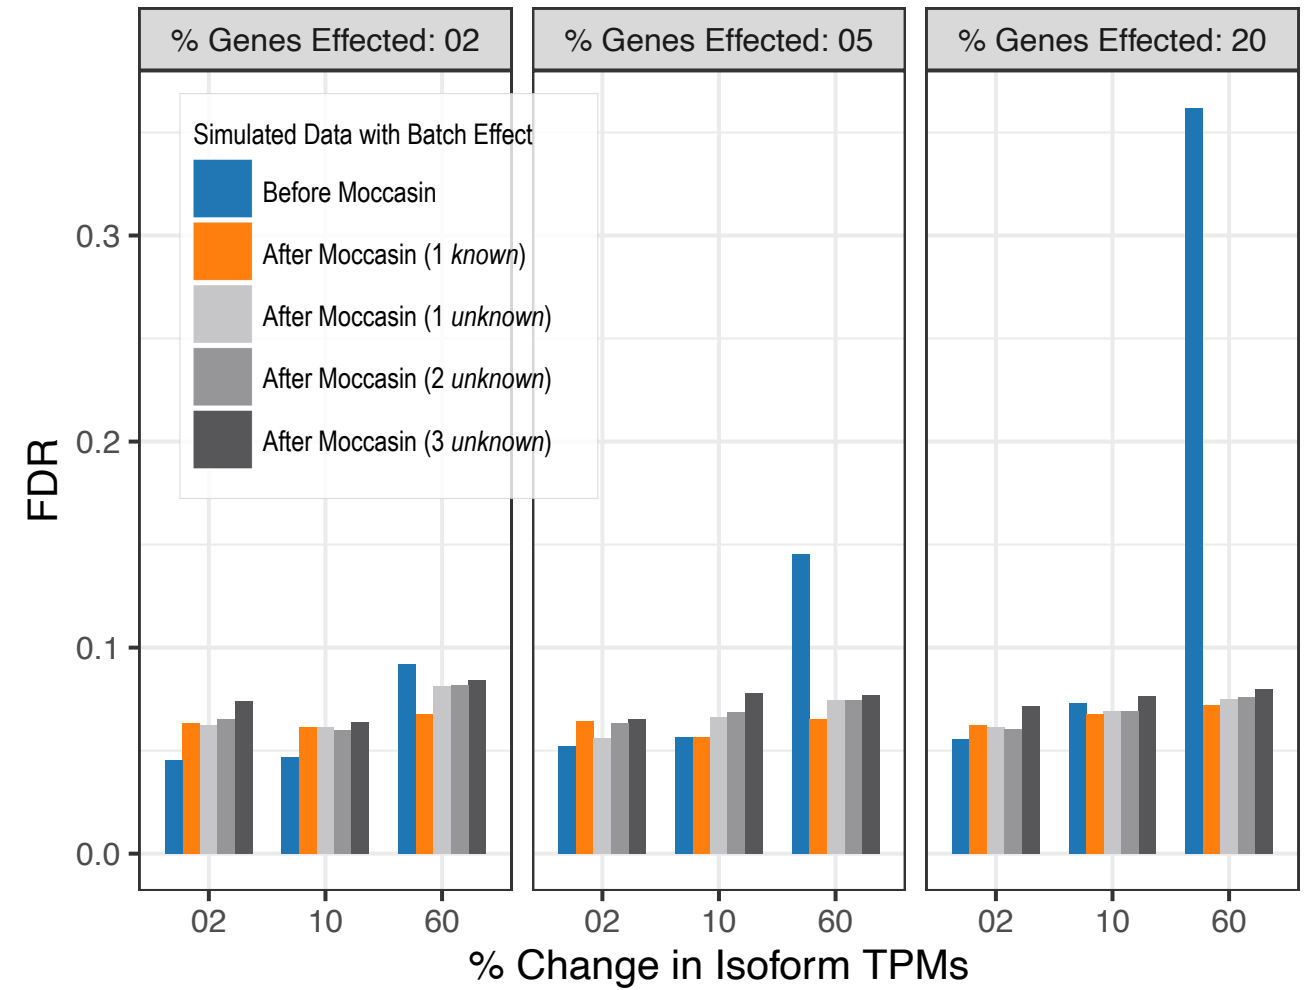

Supplemental Figure 3

Before MOCCASIN

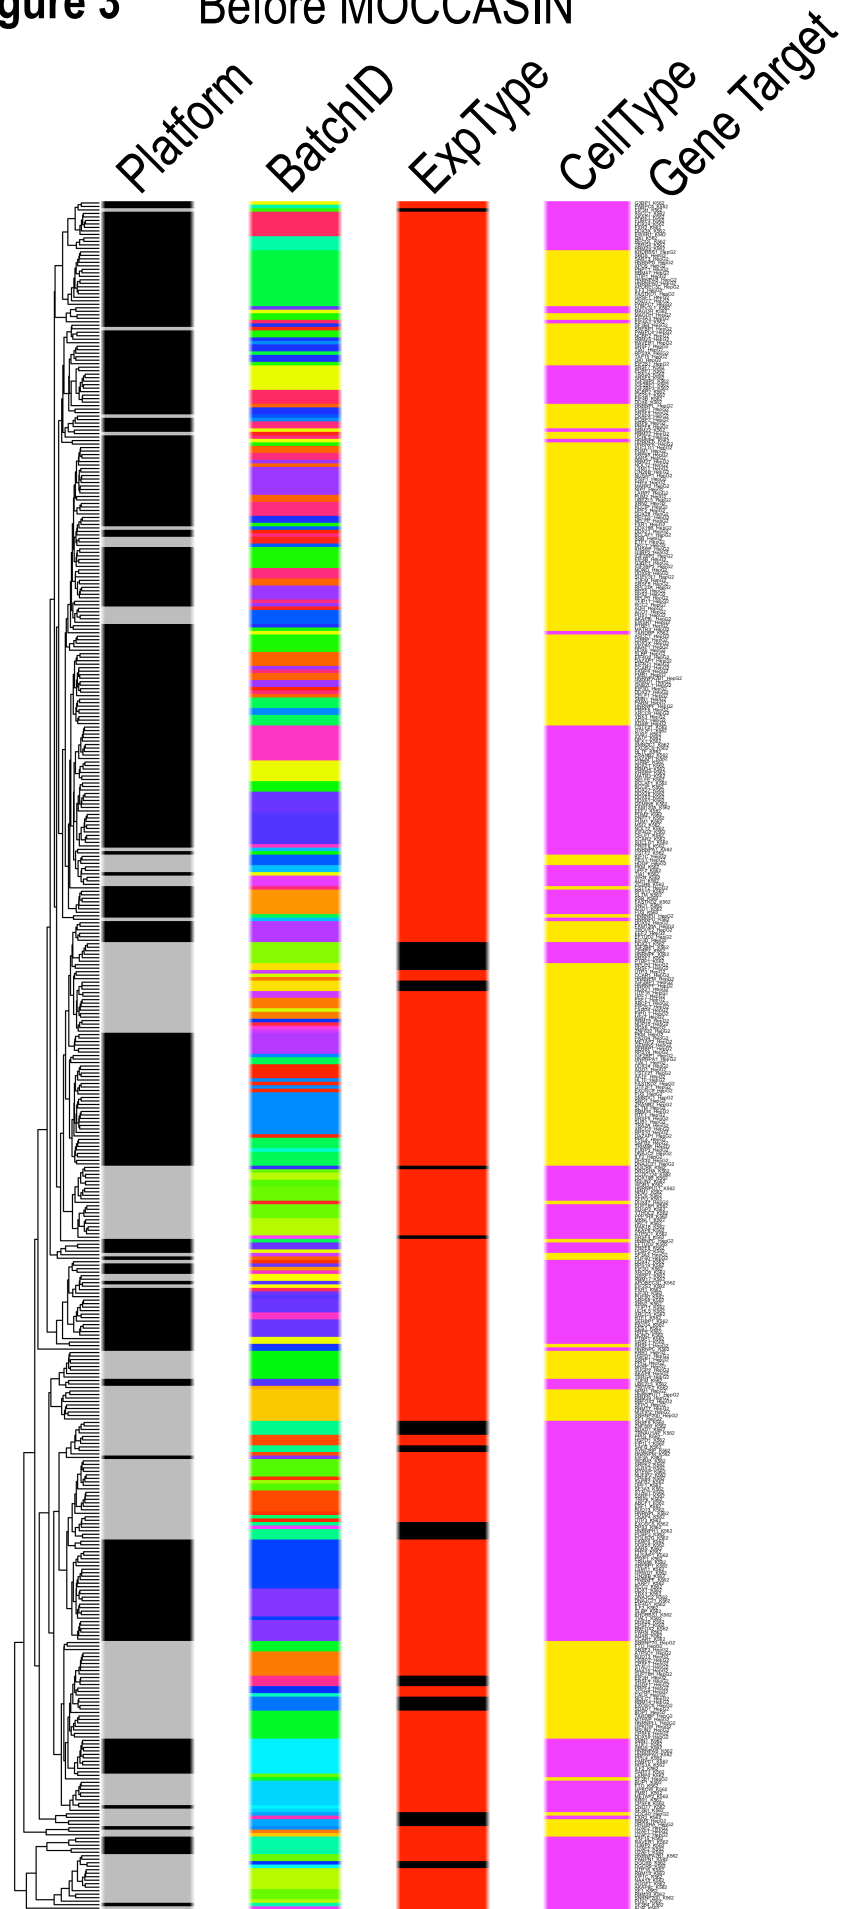

After MOCCASIN

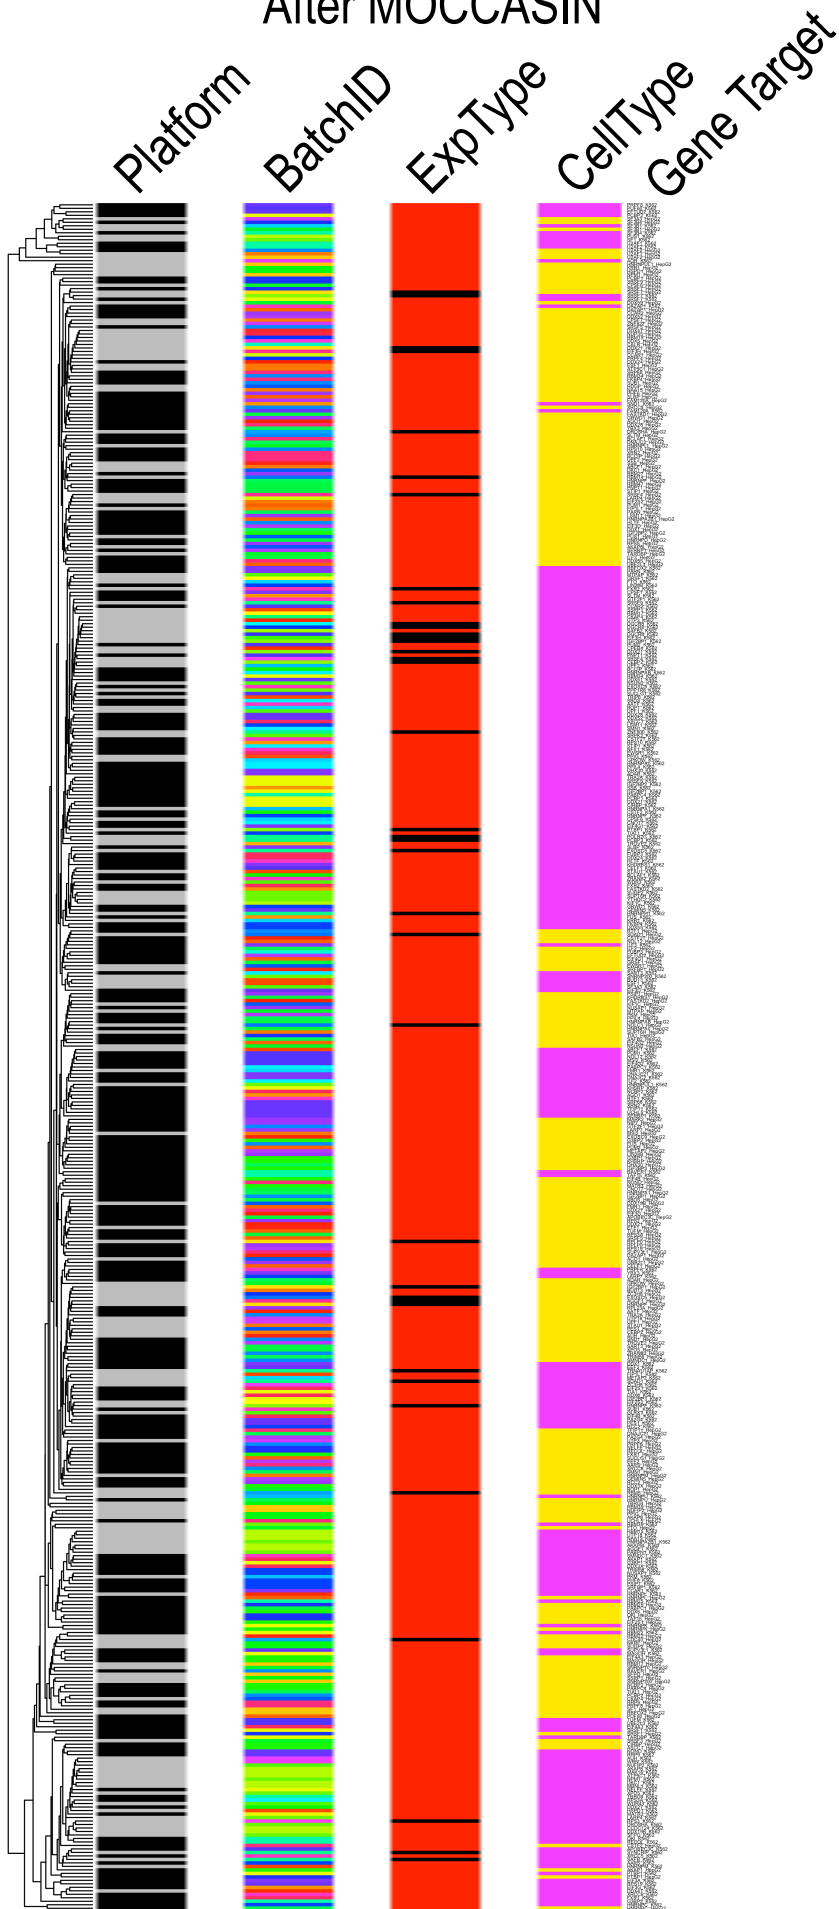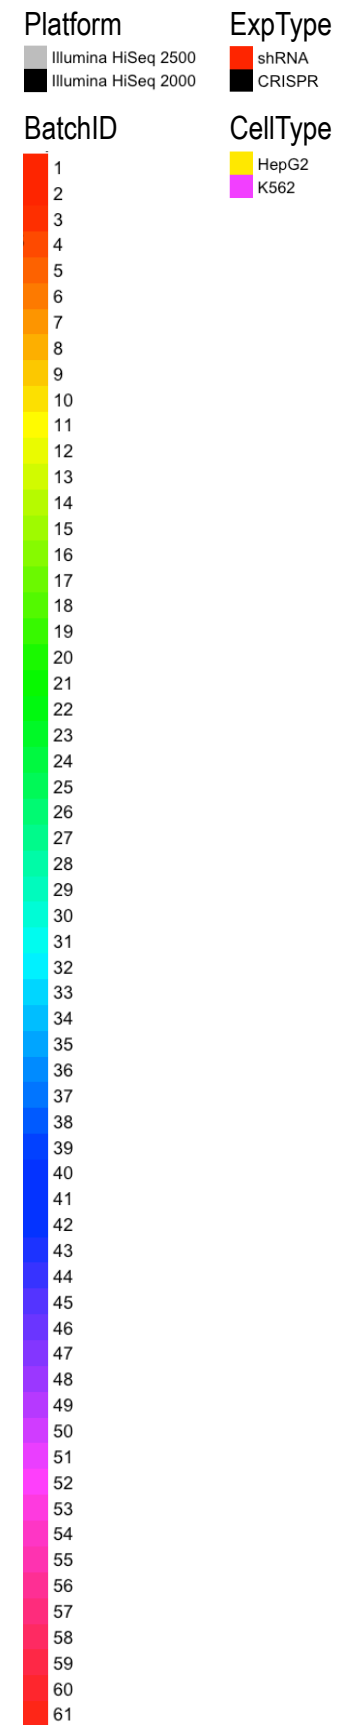

Supplement: Supplementary file [file media-2.pdf]
